## ANNOUNCEMENT

### NEW BOOK

Pål Prestrud, Hallvard Strøm, and Helle V. Goldman, editors. 2004. *A Catalogue of the Terrestrial and Marine Animals of Svalbard*. Norwegian Polar Institute, Skrifter 201. 137 pages; paperback. Polar Environmental Centre, NO-9296 Tromsø, Norway. ISBN 82-7666-205-6. No price given. Place orders by e-mailing [sales@npolar.no](mailto:sales@npolar.no) or faxing +47 77 75 05 00.

The book has four chapters, each with various authors: Chapter 1: Introduction; Chapter 2: The marine macro-organisms in Svalbard waters; Chapter 3: The terrestrial and freshwater invertebrate fauna of Svalbard (and Jan Mayen); and Chapter 4: The bird and mammal fauna of Svalbard.

Svalbard is an archipelago of mountainous islands in the Arctic Ocean, located between

74°N and 81°N latitudes and 10°E and 35°E longitudes. Jan Mayen island is located between the Greenland Sea and the Norwegian Sea, at 71°N, 8°30'W. The catalogue lists a total of 2981 species, including 1708 marine species (larger than about 1 mm) from 18 phyla. The largest species diversity is found in the Crustacea, with 467 species, followed by the Mollusca, with 252 species. Each species is annotated with reference numbers that are keyed to an extensive references section, which serves to document the occurrence of the species in the study area. There are 140 references listed in Chapter 2 and 346 in Chapter 3, for example. Anyone with an interest in the biodiversity of the high Arctic region should enjoy studying this book.
